# Supplementary material
Source: publisher site journal article supplement (https://www.dovepress.com/get_supplementary_file.php?f=488141.docx)
Supplement: Supplementary file 1 [file get_supplementary_file.php]

| Supplementary material: The final questionnaire  Questionnaire No.: ________________  Dear Sir/Madam:  Greetings!  We are researchers and we invite you to participate in our research on the current status of knowledge, attitudes, and practices toward exercise therapy among patients with stage 5 chronic kidney disease underwent regular dialysis. The purpose of this study is to provide a more scientific tool for evaluating the level of knowledge, attitudes, and practices toward exercise therapy among patients with stage 5 chronic kidney disease underwent regular dialysis, and to investigate the current situation and analyze the factors affecting their level of knowledge-attitudes-practices, so as to provide a reference for carrying out targeted training about exercise therapy, in order to increase the knowledge base of exercise therapy in the population of CKD5 patients, and to promote the rehabilitation of patients.  Thank you very much for filling in this questionnaire in your busy schedule, the process of filling in will take you about 10~15 minutes, the study will not affect your interests, the data obtained from the survey will be coded, and will be stored safely and published in the form of group data, your name and personal data will not be mentioned, and the relevant information will not be disclosed to anyone without your permission. Your name and personal data will not be mentioned and the information will not be shared with anyone without your permission. Please complete the questionnaire independently without consulting the relevant knowledge and your support will be greatly appreciated!  □I have been informed and agreed to the use of the collected data for scientific research.  Informed Consent Signature:  Date of participation: YYYY MM DD | |
| --- | --- |
| **Part I Basic Information** | |
| **1.Your gender:** | a. Male  b. Female |
| **2.Your age:** | a. Less than 20 years old  b. 21-30 years old  c. 31-40 years old  d. 41-50 years old  e. 51-60 years old  f. Above 60 years old |
| **3. Your BMI (Body Mass Index) level: weight (kg) ÷ height (m2).**  **(If you are in doubt about this option, please consult your treating doctor before choosing)** | a. ＜18.5 (light)  b. 18.5-23.9 (normal)  c. 24-27.9 (overweight)  d. ＞28 (obese) |
| **4. Your residence:** | a. Rural  b. Urban |
| **5.Your education:** | a. Middle School and below  b. High School and Technical secondary school  c. Junior college and Bachelor's degree  d. Master's degree and above |
| **6. In the past year, your family's monthly per capita income was (including in-kind income and rental income, etc.):______ Yuan** | a. <2000  b. 2000-5000  c. 5000-10000  d. 10000-20000  e. >20000 |
| **7. Medical insurance (multiple choice):** | a. Basic medical insurance for urban employees  b. New Cooperative Medical insurance  c. Basic medical insurance for urban residents  d. Medical insurance for retired  e. Commercial insurance  f. No insurance |
| **8.Do you receive support from your family?**  **(e.g., family companionship / care, psychological comfort, etc.)** | a. Yes  b. No |
| **9.Your duration of dialysis:** | a. Less than 1 year  b. 1 - 5 years (including 5 full years)  c. 5 - 10 years (including 10 full years)  d. More than 10 years |
| **10.Your dialysis frequency:** | a. Once a day for 4 hours  b. Once every other day for 5 hours  c. Twice a week for 5 hours each time  d. 3 times a week for 4 hours each time  e. Other |
| **11.Did you receive any of the following healthcare interventions? (Multiple choice possible)** | a. Health education in hospital (e.g., our health care providers tell you that you should control your weight and diet. To educate you about your illness. Receiving counselling or talking to you, etc.)  b. Medication instructions (e.g., our healthcare provider tells you how much, how often, and how long to take your medication. Intervals of medication. What to do if you miss a dose. Symptoms of adverse drug reactions, etc.)  c. Dietary interventions (e.g. our healthcare professionals advise you to eat a light diet. Reduce the intake of animal fats. Protein supplementation, etc.)  d. Exercise intervention (e.g. our healthcare professionals will develop an exercise programme for you. Jogging, tai chi, etc. Tai chi, etc. for light to moderate intensity exercise)  e. Did not receive any of the above |
| **12. Do you suffer from any of the following diseases? (Multiple choice possible)** | a. Hypertension  b. Diabetes mellitus  c. Chronic nephritis  d. Polycystic kidney  e. Other  f. None |
| **13. Do you use any of the following medications? (Multiple choice possible)** | a. Antihypertensive drugs (e.g., Valsartan. Benadryl. Felodipine. Amlodipine, etc.)  b. Chinese patent drug for proteinuria (e.g. Huangkui capsule. Renfukang capsule. Piperazine Ferulic Acid Tablets. Nephritis Four Flavour Tablets. Jinshuibao. Bailing capsule, etc.)  c. Diuretics (e.g., Hydrochlorothiazide. Spironolactone. Bumetanide. Torasemide, etc.)  d. Creatinine-lowering drugs (e.g. Urethane. Acitretin. Nephronine. Aldox starch. Compound alpha-keto acids, etc.)  e. None of the above |

| **Part II Knowledge of exercise therapy and stage 5 chronic kidney disease**   | **1. Exercise therapy is one of the adjunctive methods in the treatment of end-stage chronic kidney disease. (Correct)** | a. Correct | b. Wrong | c. Unclear | | --- | --- | --- | --- | | **2. The patient's quality of life will be seriously affected by the decline in renal function and cardiopulmonary function as well as muscle atrophy. (Correct)** | a. Correct | b. Wrong | c. Unclear | | **3. Exercise therapy can improve the cardiopulmonary endurance of patients with CKD. (Correct)** | a. Correct | b. Wrong | c. Unclear | | **4. Exercise therapy can reduce the risk of cardiovascular disease in patients to some extent. (Correct)** | a. Correct | b. Wrong | c. Unclear | | **5. Exercise therapy can help to maintain the body's muscle mass and reduce the decomposition of muscle protein. (Correct)** | a. Correct | b. Wrong | c. Unclear | | **6. Before performing moderate or high-intensity exercise, an exercise load test should be performed under the supervision of a professional medical staff to control the intensity of exercise. (Correct)** | a. Correct | b. Wrong | c. Unclear | | **7. Physical condition should be assessed regularly and the treatment plan of exercise therapy should be adjusted in a timely manner. (Correct)** | a. Correct | b. Wrong | c. Unclear | | **8. Flexibility exercises such as neck joint and hip joint, aerobic exercises such as jogging and bicycling, resistance exercise such as resistance band training, supine leg lifting and etc. are all types of exercise therapy. (Correct)** | a. Correct | b. Wrong | c. Unclear | | **9. Appropriate stretching and warm-up exercises should be done before carrying out exercise therapy. (Correct)** | a. Correct | b. Wrong | c. Unclear | | **10. You need to stop immediately if you feel uncomfortable during exercise (such as burning pain in the chest, arms, etc., sense of narrowing, sense of chest tightness, weakness, etc). (Correct)** | a. Correct | b. Wrong | c. Unclear | | **11. You need to pay attention to heart rate changes during exercise to prevent cardiovascular adverse events. (Correct)** | a. Correct | b. Wrong | c. Unclear | | **12. The more hours you spent exercising, the better is the effect. (Wrong)** | a. Correct | b. Wrong | c. Unclear | | **13. It is generally recommended to start with low intensity exercise training and gradually reach a moderate level of exercise. (Correct)** | a. Correct | b. Wrong | c. Unclear | |
| --- | --- | --- | --- | --- | --- | --- | --- | --- | --- | --- | --- | --- | --- | --- | --- | --- | --- | --- | --- | --- | --- | --- | --- | --- | --- | --- | --- | --- | --- | --- | --- | --- | --- | --- | --- | --- | --- | --- | --- | --- | --- | --- | --- | --- | --- | --- | --- | --- | --- | --- | --- | --- |

| **Part III Attitude to exercise therapy and stage 5 chronic kidney disease** | | | | | |
| --- | --- | --- | --- | --- | --- |
| **l. You acknowledge the significance of exercise therapy in facilitating the patient's recovery from the disease.** | a.Strongly agree  5 points | b.Agree  4 points | c. Neutral  3 points | d.Disagree  2 points | e.Strongly disagree  1 point |
| **2. You have a keen interest in expanding your knowledge about exercise therapy by referring to literature, online resources, or consulting healthcare professionals.** | a.Strongly agree  5 points | b.Agree  4 points | c. Neutral  3 points | d.Disagree  2 points | e.Strongly disagree  1 point |
| **3. You are inclined to recommend exercise therapy to individuals with end-stage CKD.** | a.Strongly agree  5 points | b.Agree  4 points | c. Neutral  3 points | d.Disagree  2 points | e.Strongly disagree  1 point |
| **4. You proactively approach your primary physician to formulate a treatment plan for exercise therapy and diligently adhere to the prescribed exercise regimen.** | a.Strongly agree  5 points | b.Agree  4 points | c. Neutral  3 points | d.Disagree  2 points | e.Strongly disagree  1 point |
| **5. You recognize the importance of implementing the exercise program in a systematic manner and refrain from making adjustments once the plan has been established.** | a.Strongly agree  1 point | b.Agree  2 points | c. Neutral  3 points | d.Disagree  4 points | e.Strongly disagree  5 points |
| **6. You are open to incorporating a comprehensive exercise therapy approach that combines resistance training, aerobic training, and other suitable exercise modalities.** | a.Strongly agree  5 points | b.Agree  4 points | c. Neutral  3 points | d.Disagree  2 points | e.Strongly disagree  1 point |
| **7. To ensure the safe implementation of exercise therapy, you prioritize pre-exercise physical assessments and engage in warm-up exercises and other preparatory measures.** | a.Strongly agree  5 points | b.Agree  4 points | c. Neutral  3 points | d.Disagree  2 points | e.Strongly disagree  1 point |
| **8. You acknowledge the possibility of experiencing discomfort such as dizziness or fatigue during exercise therapy but remain committed to its implementation.** | a.Strongly agree  1 point | b.Agree  2 points | c. Neutral  3 points | d.Disagree  4 points | e.Strongly disagree  5 points |
| **9. You understand that exercise therapy requires long-term dedication and may be time-consuming, posing challenges in real-life practice.** | a.Strongly agree  1 point | b.Agree  2 points | c. Neutral  3 points | d.Disagree  4 points | e.Strongly disagree  5 points |

| **Part IV Practice on exercise therapy and stage 5 chronic kidney disease** |
| --- |
| 1. **Frequency of seeking knowledge related to exercise therapy through various sources (e.g., books, internet, newspapers, etc.).**   a. Always (the frequency of practice within the last 2 months is more than 6 times)  b. Frequently ( the frequency of practice within the last 2 months is 5 - 6 times)  c. Sometimes (the frequency of practice within the last 2 months is 3 - 4 times)  d. Occasionally (the frequency of practice within the last 2 months is 1 - 2 times)  e. Never (the frequency of practice within the last 2 months is 0 times) |
| 1. **Frequency of contacting the attending doctor or medical staff to develop or adjust an exercise program.**   a. Always (the frequency of practice within the last 2 months is more than 6 times)  b. Frequently ( the frequency of practice within the last 2 months is 5 - 6 times)  c. Sometimes (the frequency of practice within the last 2 months is 3 - 4 times)  d. Occasionally (the frequency of practice within the last 2 months is 1 - 2 times)  e. Never (the frequency of practice within the last 2 months is 0 times) |
| 1. **Frequency of participating in in-hospital education on exercise therapy carried out by the hospital department.**   a. Always (the frequency of practice within the last 2 months is more than 6 times)  b. Frequently ( the frequency of practice within the last 2 months is 5 - 6 times)  c. Sometimes (the frequency of practice within the last 2 months is 3 - 4 times)  d. Occasionally (the frequency of practice within the last 2 months is 1 - 2 times)  e. Never (the frequency of practice within the last 2 months is 0 times) |
| 1. **Frequency of sharing experience and opinions about exercise therapy with other patients.**   a. Always (the frequency of practice within the last 2 months is more than 6 times)  b. Frequently ( the frequency of practice within the last 2 months is 5 - 6 times)  c. Sometimes (the frequency of practice within the last 2 months is 3 - 4 times)  d. Occasionally (the frequency of practice within the last 2 months is 1 - 2 times)  e. Never (the frequency of practice within the last 2 months is 0 times) |
| 1. **Frequency of paying attention to his/her own physical condition,such as cardiopulmonary function and muscle atrophy.**   a. Always (the frequency of practice within the last 2 months is more than 6 times)  b. Frequently ( the frequency of practice within the last 2 months is 5 - 6 times)  c. Sometimes (the frequency of practice within the last 2 months is 3 - 4 times)  d. Occasionally (the frequency of practice within the last 2 months is 1 - 2 times)  e. Never (the frequency of practice within the last 2 months is 0 times) |
| 1. **Frequency of practicing exercise therapy recommended by the doctor (e.g., resistance training, jogging, aerobic training).**   a. Always (the frequency of practice within the last 2 months is more than 6 times)  b. Frequently ( the frequency of practice within the last 2 months is 5 - 6 times)  c. Sometimes (the frequency of practice within the last 2 months is 3 - 4 times)  d. Occasionally (the frequency of practice within the last 2 months is 1 - 2 times)  e. Never (the frequency of practice within the last 2 months is 0 times) |
| 1. **Frequency of purchasing or using exercise equipment(e.g., gym equipment in the community) for carrying out exercise therapy.**   a. Always (the frequency of practice within the last 2 months is more than 6 times)  b. Frequently ( the frequency of practice within the last 2 months is 5 - 6 times)  c. Sometimes (the frequency of practice within the last 2 months is 3 - 4 times)  d. Occasionally (the frequency of practice within the last 2 months is 1 - 2 times)  e. Never (the frequency of practice within the last 2 months is 0 times) |
| 1. **Preference for seeking support from the doctor or rehabilitation therapist to assess physical condition before and after exercise, determine fitness for exercise therapy, or adjust frequency of the current program.**   a. Always (the frequency of practice within the last 2 months is more than 6 times)  b. Frequently ( the frequency of practice within the last 2 months is 5 - 6 times)  c. Sometimes (the frequency of practice within the last 2 months is 3 - 4 times)  d. Occasionally (the frequency of practice within the last 2 months is 1 - 2 times)  e. Never (the frequency of practice within the last 2 months is 0 times) |
| 1. **Frequency of performing exercise therapy-related auxiliary work(e.g., warming up before exercise, monitoring heart rate during exercise, hydrating after exercise, etc.).**   a. Always (the frequency of practice within the last 2 months is more than 6 times)  b. Frequently ( the frequency of practice within the last 2 months is 5 - 6 times)  c. Sometimes (the frequency of practice within the last 2 months is 3 - 4 times)  d. Occasionally (the frequency of practice within the last 2 months is 1 - 2 times)  e. Never (the frequency of practice within the last 2 months is 0 times) |
